# Supplementary material for: Does the tautomeric status of the adenine bases change upon the dissociation of the A*·Asyn Topal–Fresco DNA mismatch? A combined QM and QTAIM atomistic insight
Source: Royal Society of Chemistry journal article supplement (doi:10.1039/c3cp54708f), 2013-12-13
Supplement: c3cp54708f.pdf [file c3cp54708f.pdf]

## Supplementary Information

### Does the tautomeric status of the adenine bases change under the dissociation of the $A^* \cdot A_{\text{syn}}$ Topal-Fresco DNA mismatch? A combined QM and QTAIM atomistic insight

Ol'ha O. Brovarets<sup>a,b,c</sup>, Roman O. Zhurakivsky<sup>a,b</sup> and Dmytro M. Hovorun<sup>a,b,c,✉</sup>

<sup>a</sup>Department of Molecular and Quantum Biophysics, Institute of Molecular Biology and Genetics, National Academy of Sciences of Ukraine, 150 Akademika Zabolotnoho Str., 03680 Kyiv, Ukraine

<sup>b</sup>Research and Educational Center “State Key Laboratory of Molecular and Cell Biology”, 150 Akademika Zabolotnoho Str., 03680 Kyiv, Ukraine

<sup>c</sup>Department of Molecular Biology, Biotechnology and Biophysics, Institute of High Technologies, Taras Shevchenko National University of Kyiv, 2-h Akademika Hlushkova Ave., 03022 Kyiv, Ukraine

✉Corresponding author. Email: dhovorun@imbg.org.ua.

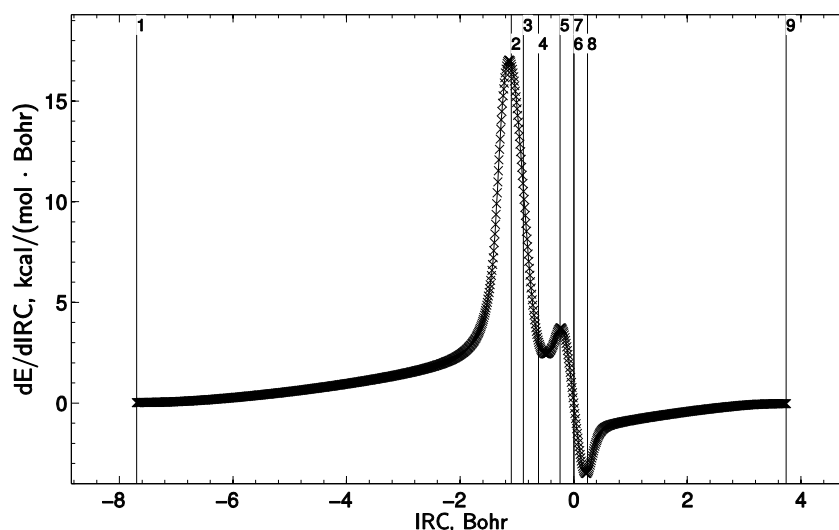

**Fig. S1** Profile of the first derivative of the electronic energy  $E$  with respect to the IRC -  $dE/dIRC$  - along the IRC of the  $A^* \cdot A_{\text{syn}} \leftrightarrow A \cdot A^*_{\text{syn}}$  tautomerisation *via* the DPT obtained at the B3LYP/6-311++G(d,p) level of theory *in vacuo*.

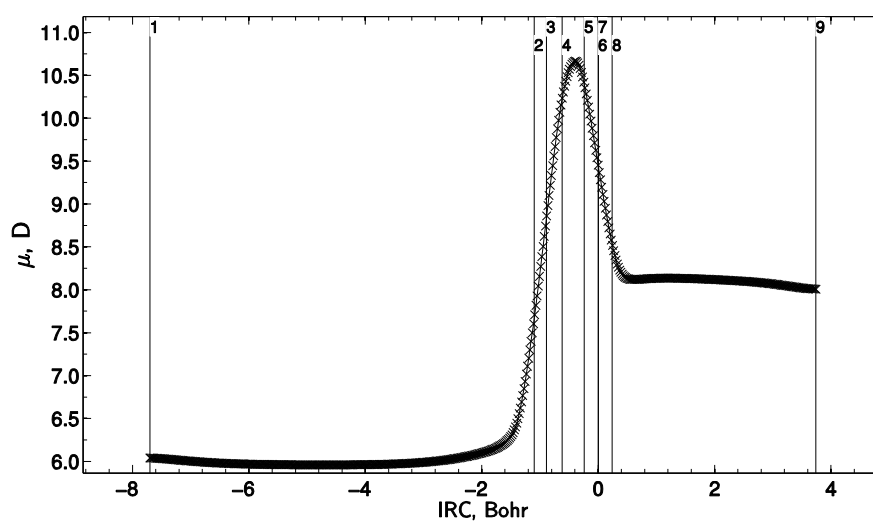

**Fig. S2** Profile of the dipole moment  $\mu$  of the base mispair along the IRC of the  $A^* \cdot A_{\text{syn}} \leftrightarrow A \cdot A^*_{\text{syn}}$  tautomerisation *via* the DPT obtained at the B3LYP/6-311++G(d,p) level of theory *in vacuo*.
